# Supplementary material
Source: PubMed Central journal article supplement (PMC5931978)
Supplement: 41396_2017_32_MOESM3_ESM.pdf [file 41396_2017_32_MOESM3_ESM.pdf]

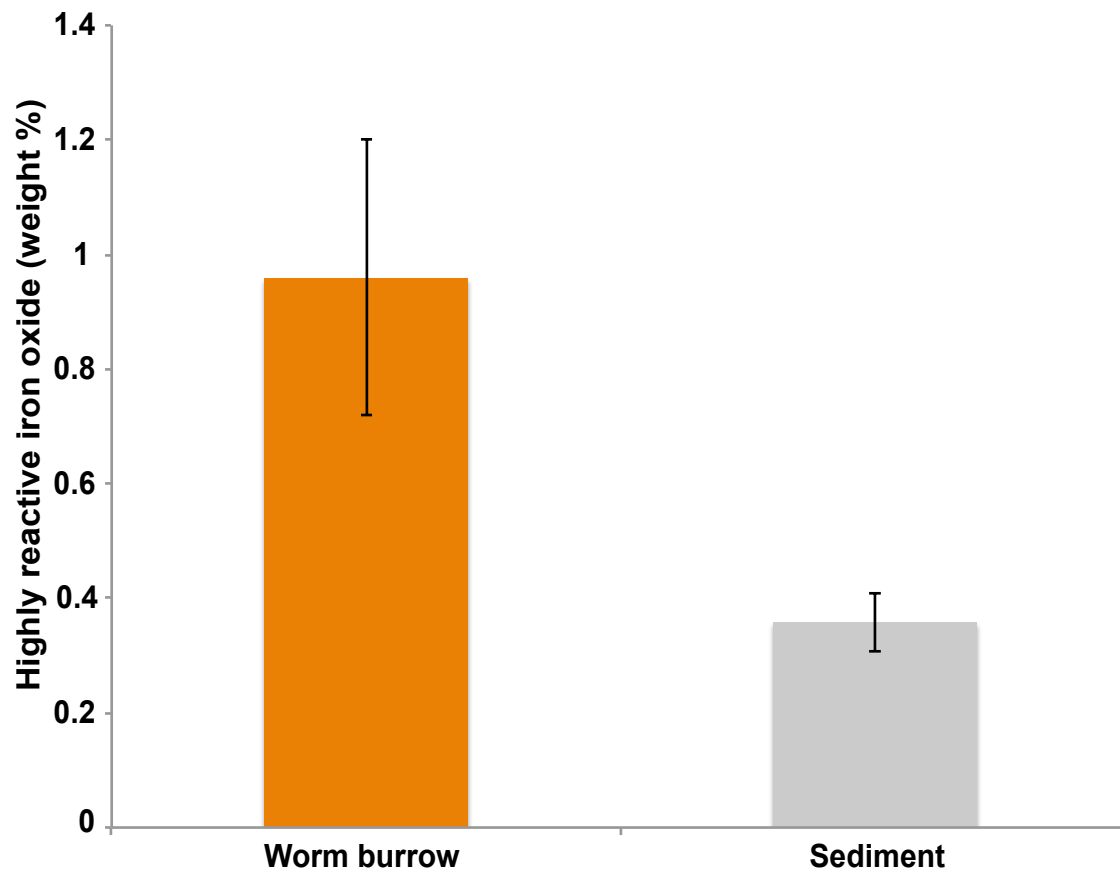

**Supplementary Figure S2.** Distribution of highly reactive iron oxides from worm burrows (n=4) and sediments (n=4) at a depth of 3 cm from “The Eddy” Sheepscot River, Maine, USA. Iron oxides are enriched at worm burrow walls as compared to bulk sediments. Error bars represent  $\pm 1$  standard deviation from the mean. Highly reactive iron oxides were extracted with sodium dithionite for 2 hours (Poulton and Canfield, 2005).
