# Supplementary material
Source: PubMed Central journal article supplement (PMC5931978)
Supplement: 41396_2017_32_MOESM5_ESM.pdf [file 41396_2017_32_MOESM5_ESM.pdf]

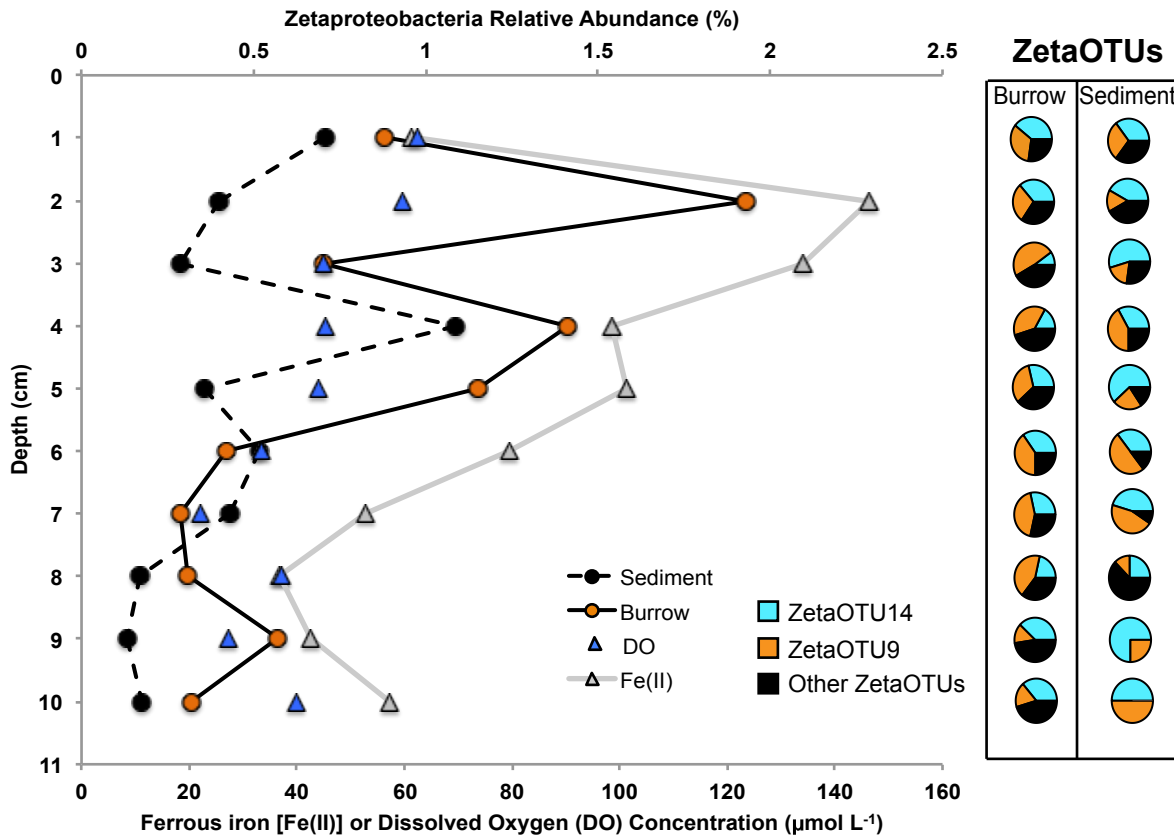

**Supplementary Figure S4.** Relative abundance of Zetaproteobacteria in iron oxide-lined burrows (orange circles and line) and sediments (black circles and line) as a function of depth from “The Eddy” Sheepscot River, Maine, USA (sampled on 1 March 2016). Pore water ferrous iron concentration (grey circles and line, secondary x-axis) and dissolved oxygen (blue triangles, secondary x-axis) as a function of depth is included for geochemical context. Zetaproteobacteria Operational Taxonomic Units (ZetaOTUs) are indicated on the right from burrows and sediments highlighting dominant ZetaOTUs 14 (blue) and 9 (orange).
